# Supplementary material for: Mucin 21 confers resistance to apoptosis in an O-glycosylation-dependent manner
Source: Cell Death Discov. 2022 Apr 11;8:194. doi: 10.1038/s41420-022-01006-4 (PMC9001685; doi:10.1038/s41420-022-01006-4)

Supplementary material for Tian et al.

Mucin 21 confers resistance to apoptosis  
in an *O*-glycosylation dependent manner

original uncropped images

**Fig. 2 c**

Figure as in the paper

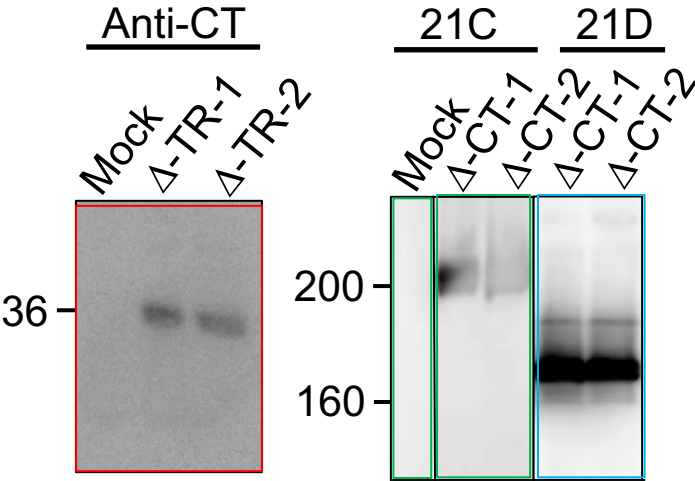

Raw image

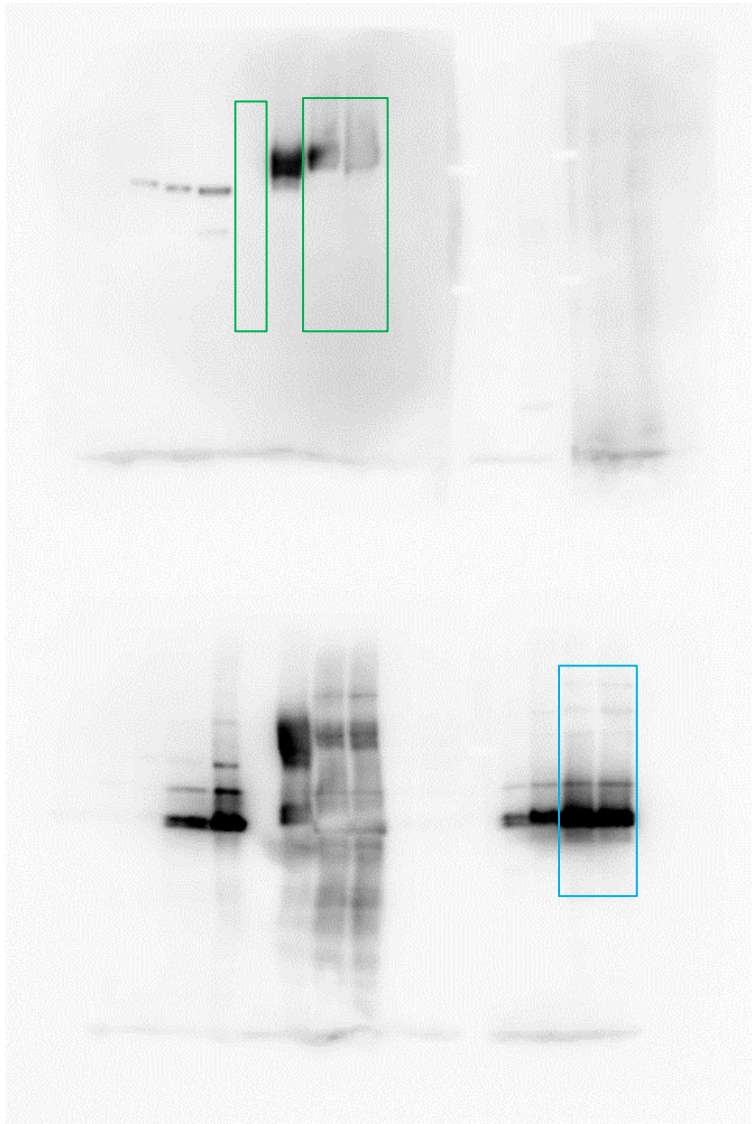

Raw image

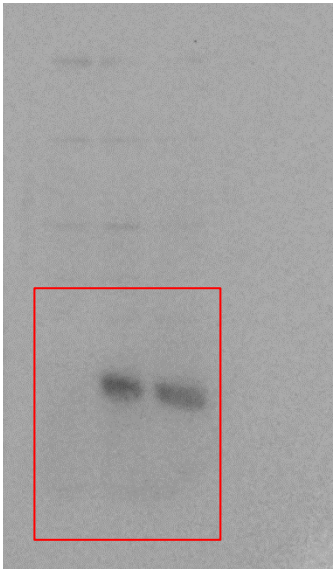

## Fig. 3 a

Figure as in the paper

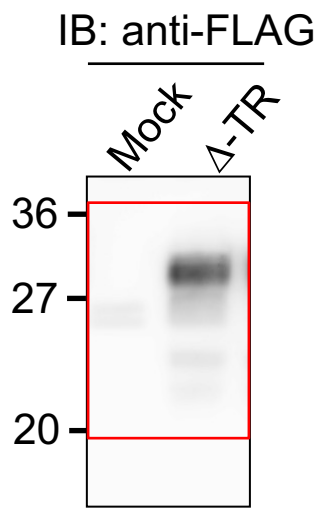

Raw image

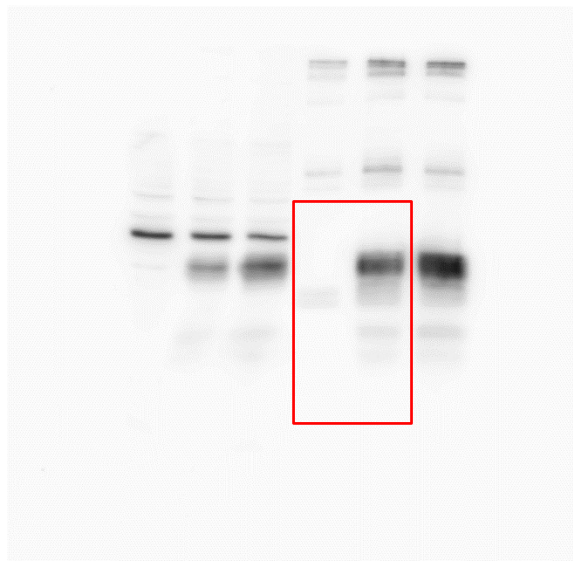

**Fig. 3 b**

Figure as in the paper

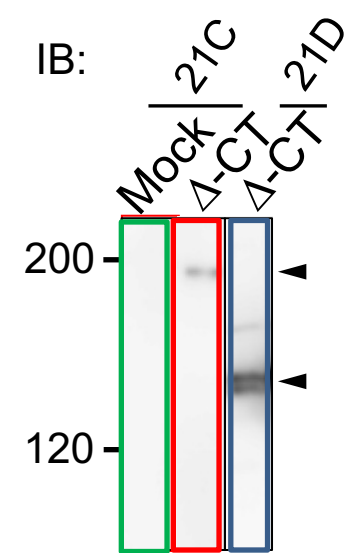

Raw image

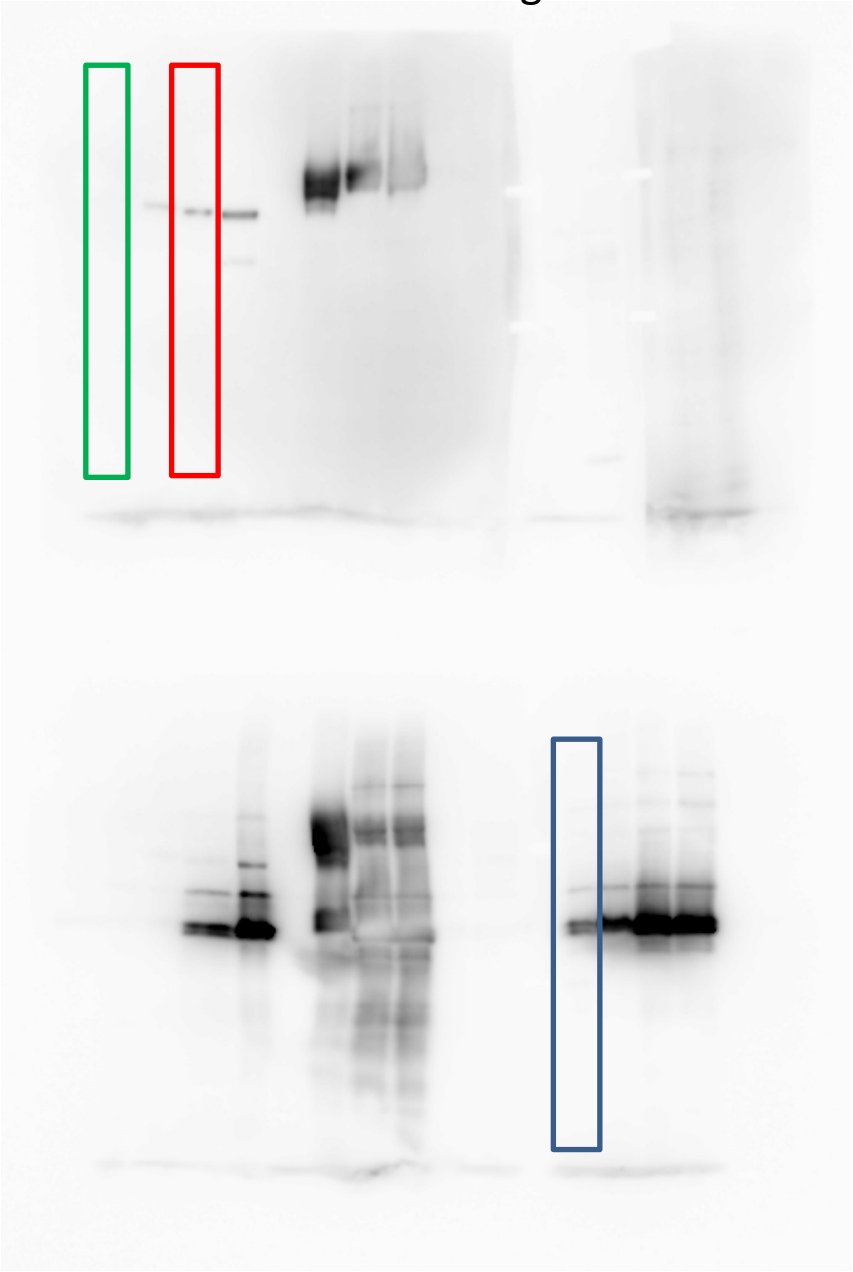

Figure as in the paper

Figure as in the paper

IP: 21C + 21D

| IB, LB: | $^{21}\text{C}^+$ |   |   |   | WVA |   |   |   | PNA |   |   |   |
|---------|-------------------|---|---|---|-----|---|---|---|-----|---|---|---|
|         | -                 | + | - | + | -   | + | - | + | -   | + | - | + |
| S:      | M                 | M | T | T | M   | M | T | T | M   | M | T | T |
|         |                   |   |   |   |     |   |   |   |     |   |   |   |

Fig. 5 c

Figure as in the paper

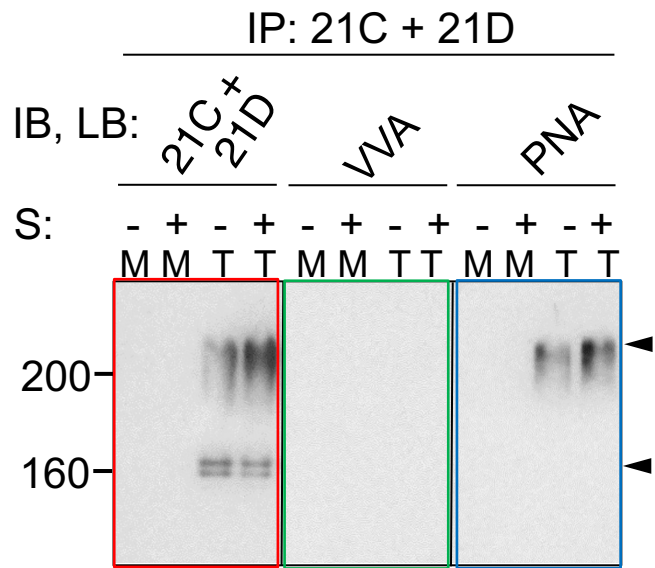

Raw image

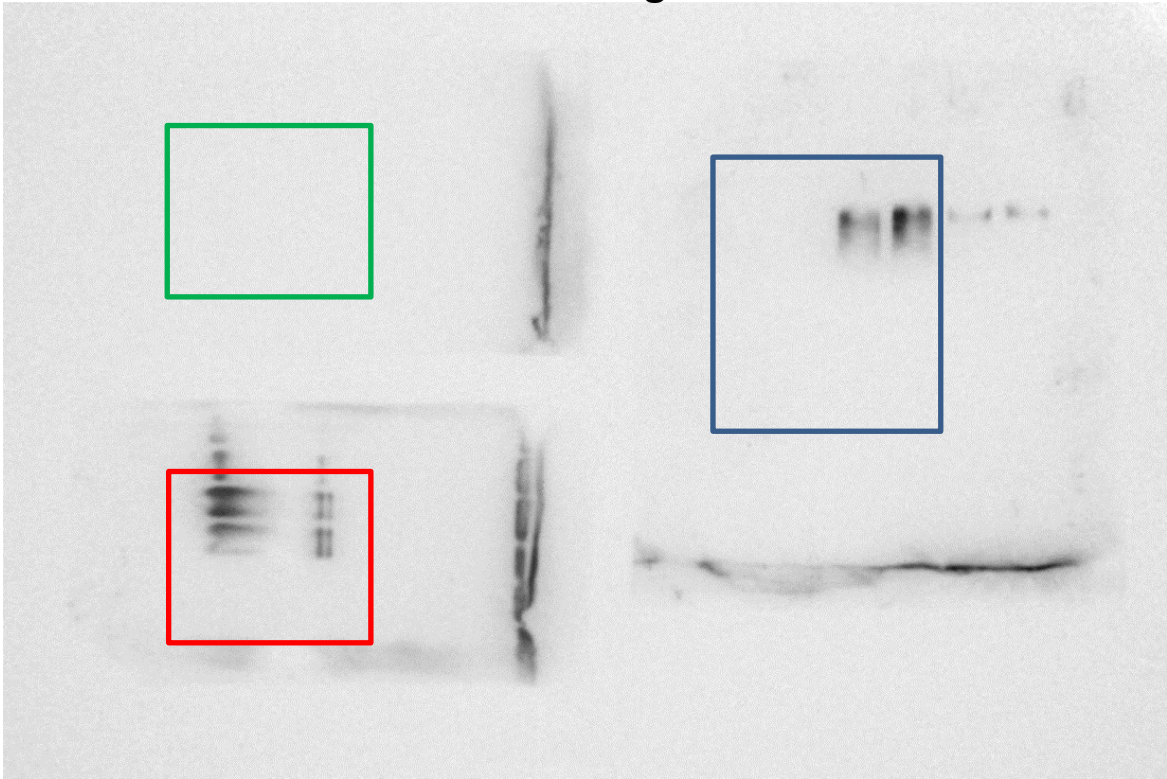

**Fig. 6 a**

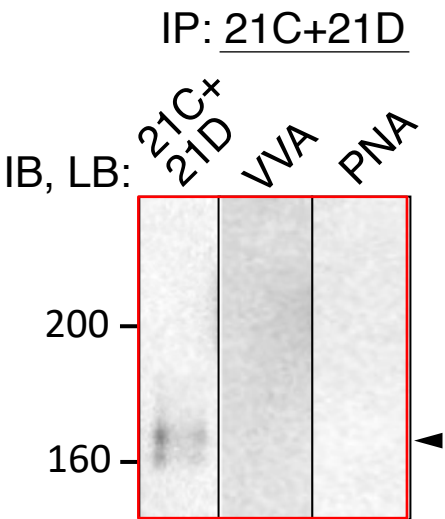

Raw image

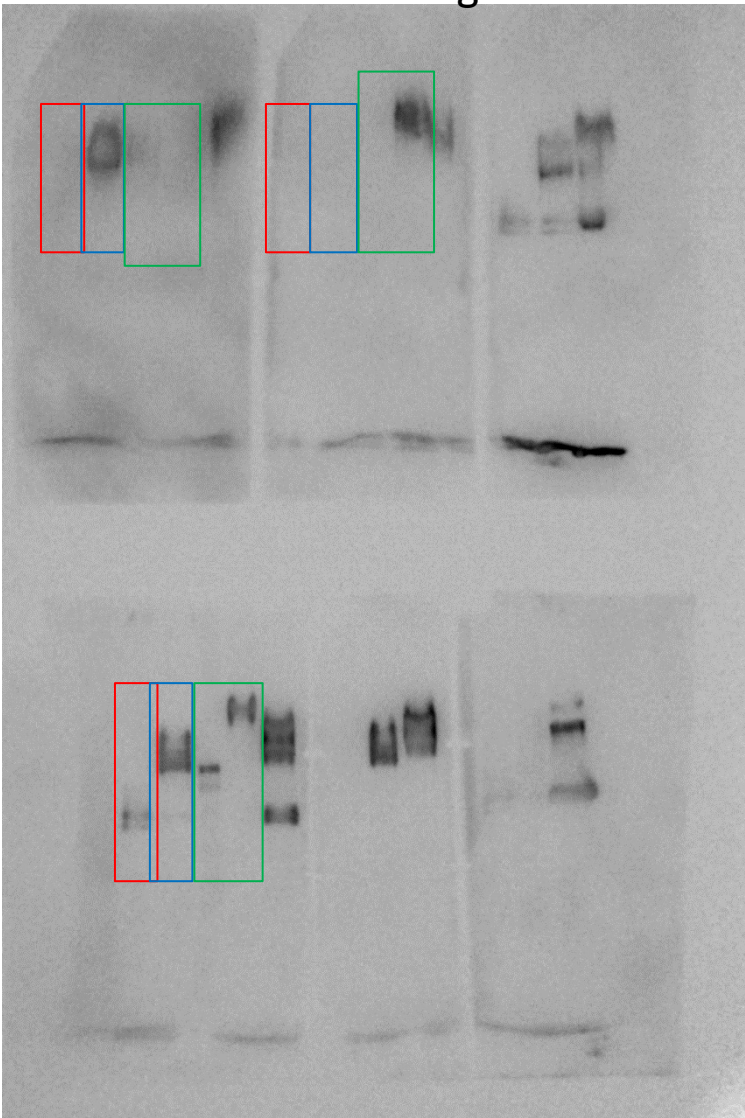

**Fig. 6 c**

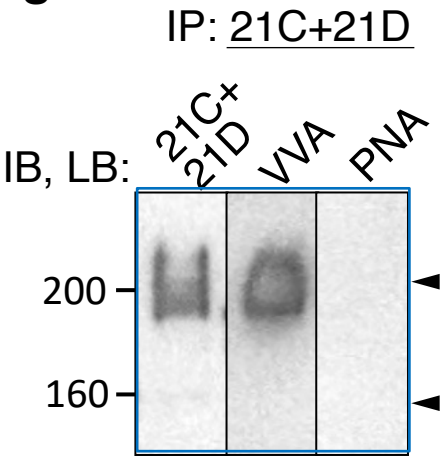

**Fig. 6 e**

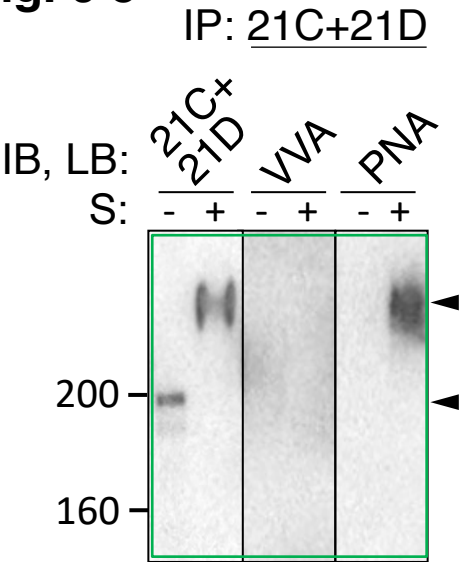

## Fig. 7 a

Figure as in the paper

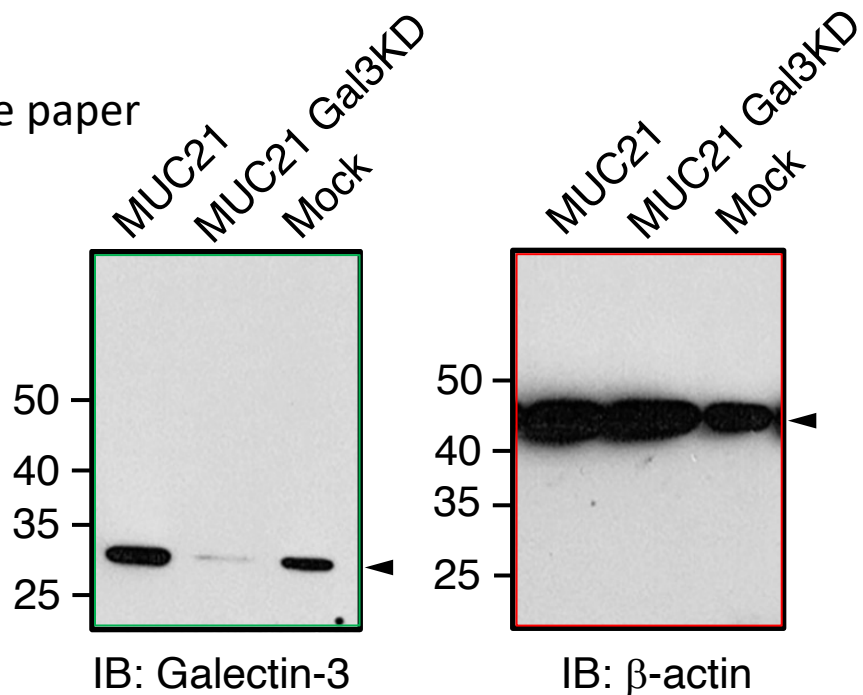

Raw image, unmanipulated

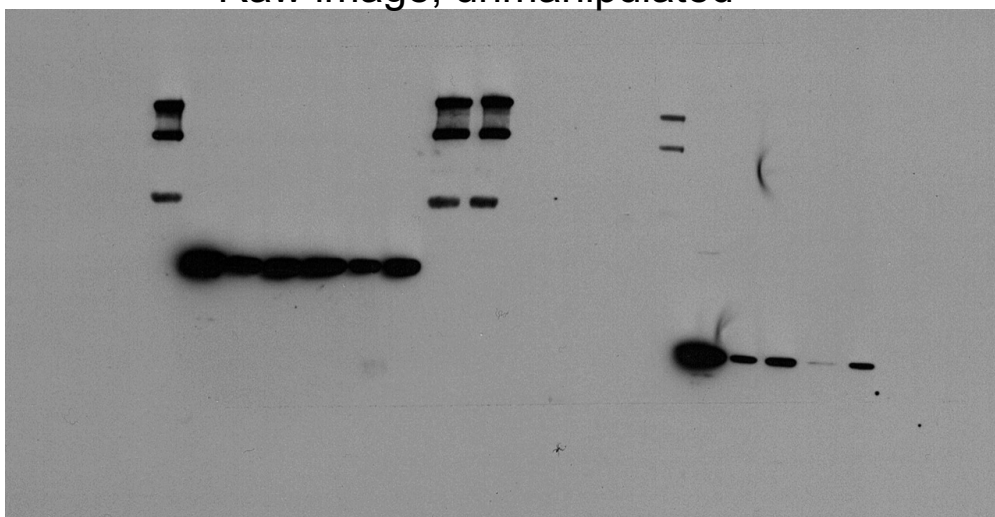

Image, manipulated by enhancing brightness and reducing contrast (both across the entire image)

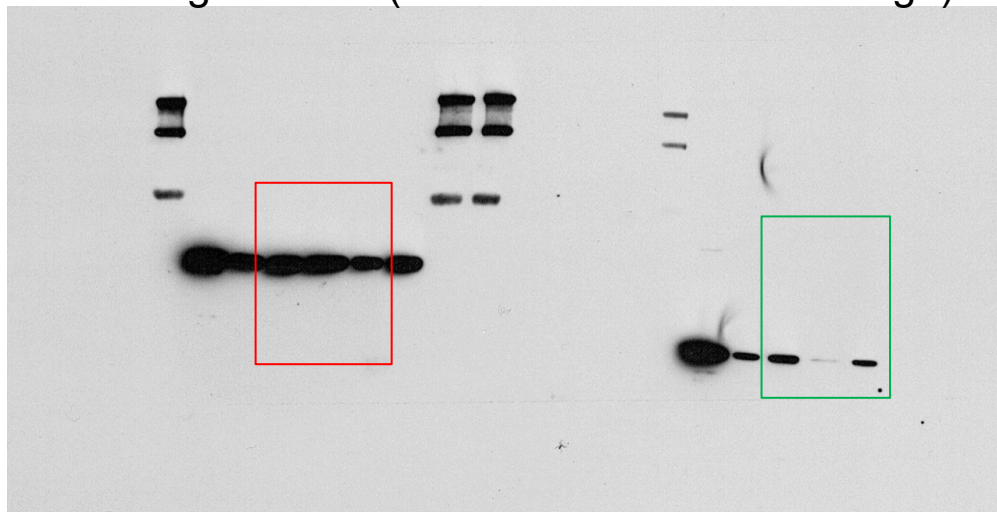

Supplement: Supplementary file 1 — Original data [file 41420_2022_1006_MOESM1_ESM.pdf]
